# Supplementary material for: Variation of Anthocyanin Content and Profile Throughout Fruit Development and Ripening of Highbush Blueberry Cultivars Grown at Two Different Altitudes
Source: PubMed Central journal article supplement (PMC6737079; doi:10.3389/fpls.2019.01045), 2019-09-04
Supplement: DataSheet_1.pdf [file DataSheet_1.pdf]

**SUPPLEMENTARY TABLE S1.** UHPLC-HR-MS data for anthocyanin identification.

| Peak | Anthocyanin | [M] <sup>+</sup> | Fragment ion[M] <sup>+</sup> |
|------|-------------|------------------|------------------------------|
| 1    | D-gal       | 465.1026         | 303.0499                     |
| 2    | D-glc       | 465.1026         | 303.0500                     |
| 3    | Cy-gal      | 449.1079         | 287.0548                     |
| 4    | D-ara       | 435.0920         | 303.0500                     |
| 5    | Cy-glc      | 449.1079         | 287.0548                     |
| 6    | Cy-ara      | 419.1000         | 287.0548                     |
| 7    | Pet-gal     | 479.1180         | 317.0655                     |
| 8    | Pet-glc     | 479.1180         | 317.0655                     |
| 9    | Peo-gal     | 463.1232         | 301.0705                     |
| 10   | Pet-ara     | 433.1127         | 317.0655                     |
| 11   | Peo-glc     | 463.1232         | 301.0705                     |
| 12   | Mv-gal      | 493.1339         | 331.0810                     |
| 13   | Peo-ara     | 433.1128         | 301.0705                     |
| 14   | Mv-glc      | 493.1339         | 331.0810                     |
| 15   | Mv-ara      | 463.1231         | 331.0810                     |
| 16   | D-Hex-Ac    | 507.1127         | 303.0490                     |
| 17   | Cy-Hex-Ac   | 491.1180         | 287.0548                     |
| 18   | Pet-Hex-Ac  | 521.1280         | 317.0655                     |
| 19   | Mv-gal-Ac   | 535.1444         | 331.0810                     |
| 20   | Peo-Hex-Ac  | 505.1330         | 301.0705                     |
| 21   | Mv-glc-Ac   | 535.1445         | 331.0810                     |

D: Delphinidin, Cy: Cyanidin, Pet: Petunidin, Peo: Peonidin, Mv: Malvidin,

gal: galactose, glc: glucose, ara: arabinose, Hex: Hexose, Ac: acetate.
