# Supplementary material for: Variation of Anthocyanin Content and Profile Throughout Fruit Development and Ripening of Highbush Blueberry Cultivars Grown at Two Different Altitudes
Source: PubMed Central journal article supplement (PMC6737079; doi:10.3389/fpls.2019.01045), 2019-09-04
Supplement: Image_3.pdf [file Image_3.pdf]

**SUPPLEMENTARY FIGURE S3.** Chromatogram integrated at 520 nm of Brigitta blueberry fruit.

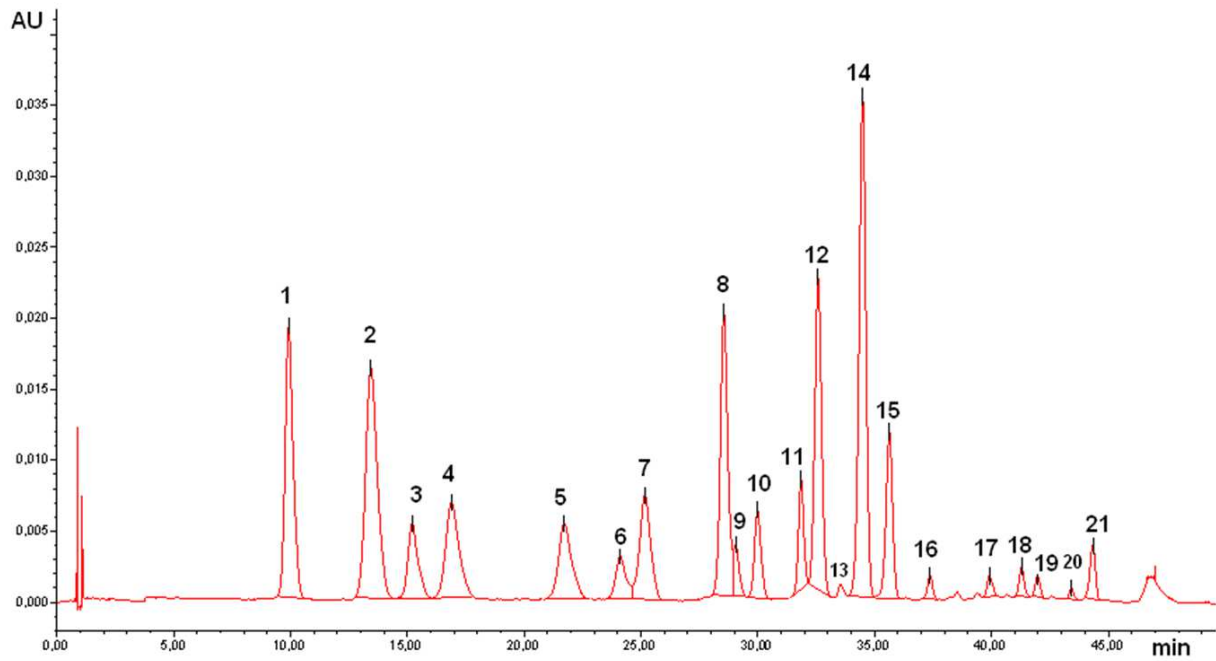

| Peak | Anthocyanin |
|------|-------------|
| 1    | D-gal       |
| 2    | D-glc       |
| 3    | Cy-gal      |
| 4    | D-ara       |
| 5    | Cy-glc      |
| 6    | Cy-ara      |
| 7    | Pet-gal     |
| 8    | Pet-glc     |
| 9    | Peo-gal     |
| 10   | Pet-ara     |
| 11   | Peo-glc     |
| 12   | Mv-gal      |
| 13   | Peo-ara     |
| 14   | Mv-glc      |
| 15   | Mv-ara      |
| 16   | D-Hex-Ac    |
| 17   | Cy-Hex-Ac   |
| 18   | Pet-Hex-Ac  |
| 19   | Mv-gal-Ac   |
| 20   | Peo-Hex-Ac  |
| 21   | Mv-glc-Ac   |

D: Delphinidin, Cy: Cyanidin, Pet: Petunidin, Peo: Peonidin,  
Mv: Malvidin, gal: galactose, glc: glucose, ara: arabinose,  
Hex: Hexose, Ac: acetate.
